# Supplementary material for: Trace element distribution between rhyolitic melts and minerals in highly crystalline assemblages: experimental approach using a quartz trap
Source: Copernicus journal article supplement (doi:10.5194/ejm-38-9-2026), 2026-01-07
Supplement: Supplementary file 1 [file Supplementary Material - Figures.pdf › Supplementary Material - Figures.pdf]

Figure S1

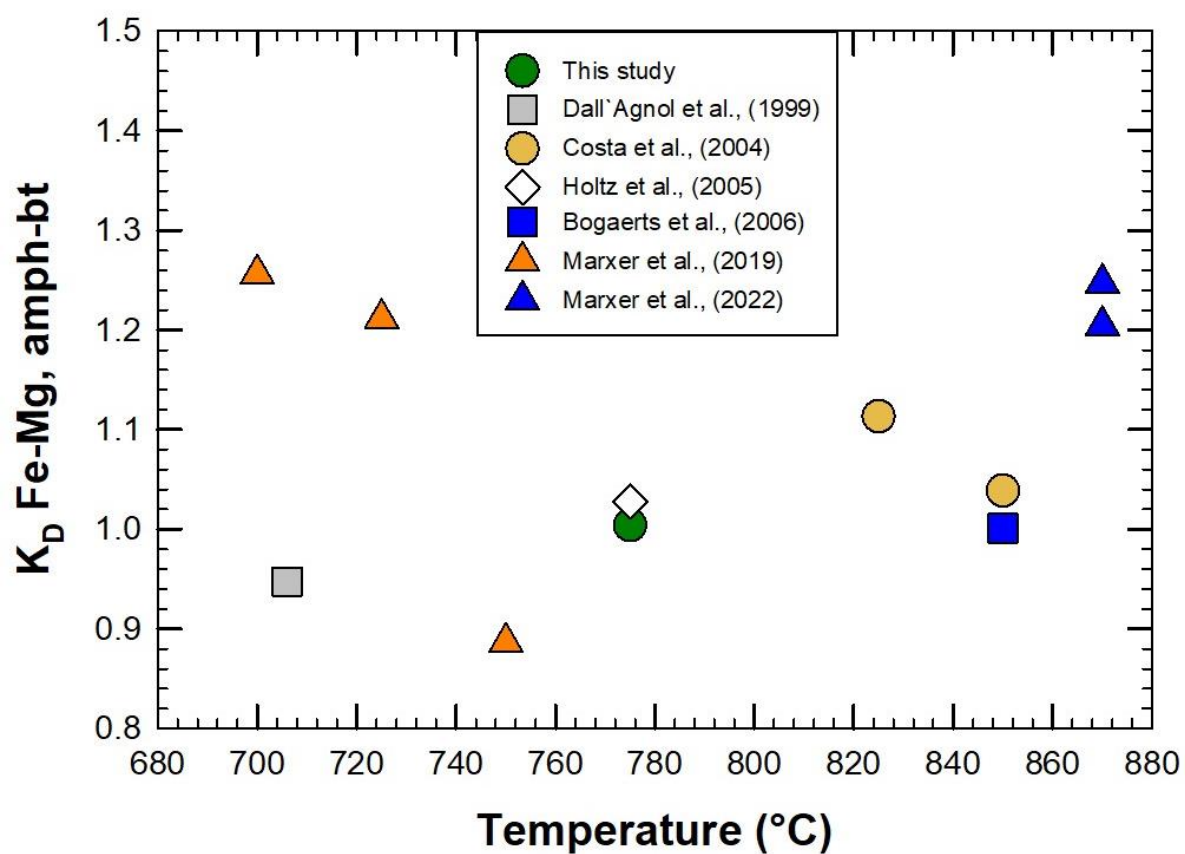

**Figure S1:** Literature and new data for amphibole–biotite Fe–Mg exchange partition coefficients. Note that at 775 °C  $K_{D,Fe-Mg,amph-bt}$  is 1.00. Please refer to the main text for details.

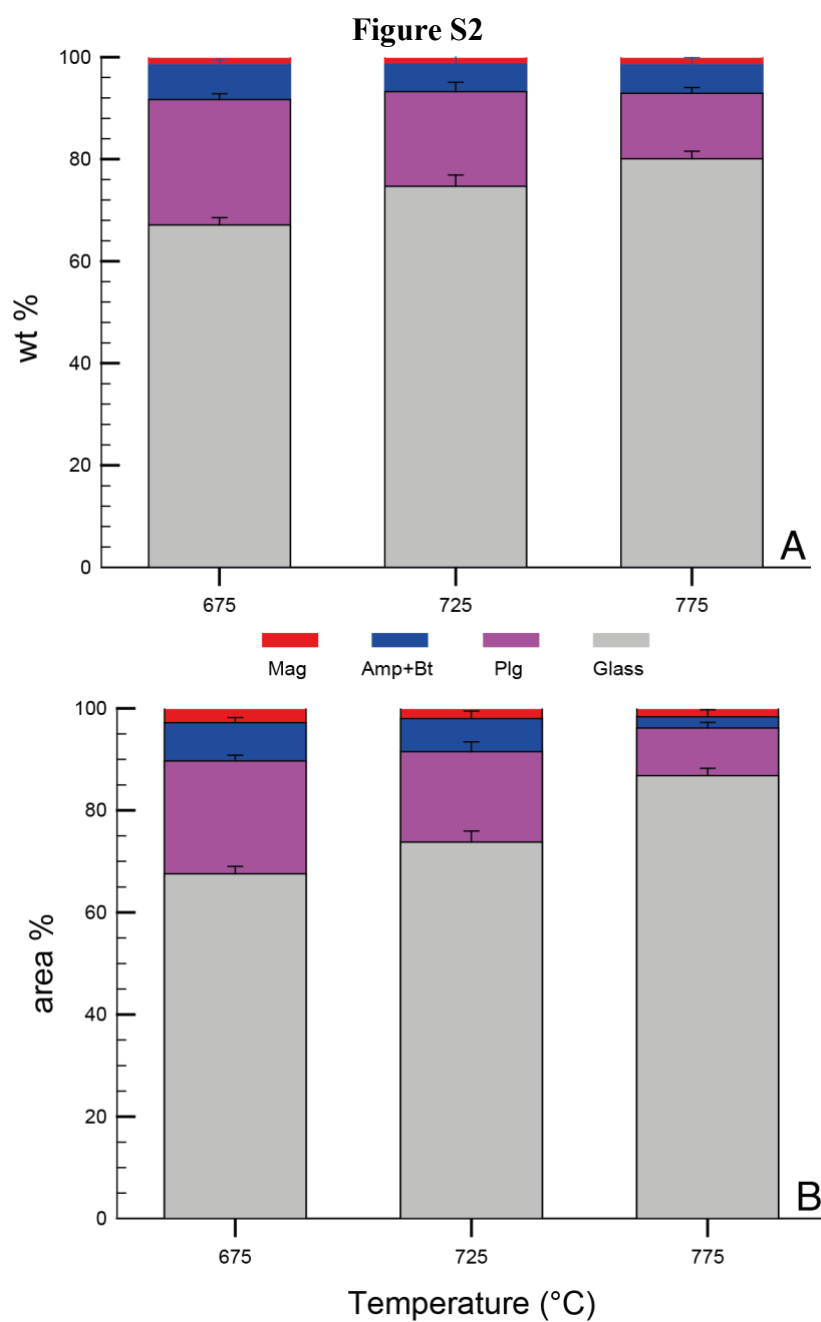

**Figure S2.** Phase proportions in experimental run products determined by mass balance (Fig. A, wt%) and by image analysis from BSE images (Fig. B, area%). Amphibole and biotite are not distinguishable in BSE images (same grey level) and are therefore plotted together in Figure 6B. Mag = magnetite, Amp = amphibole, Bt = biotite, Pl = plagioclase.

Figure S3

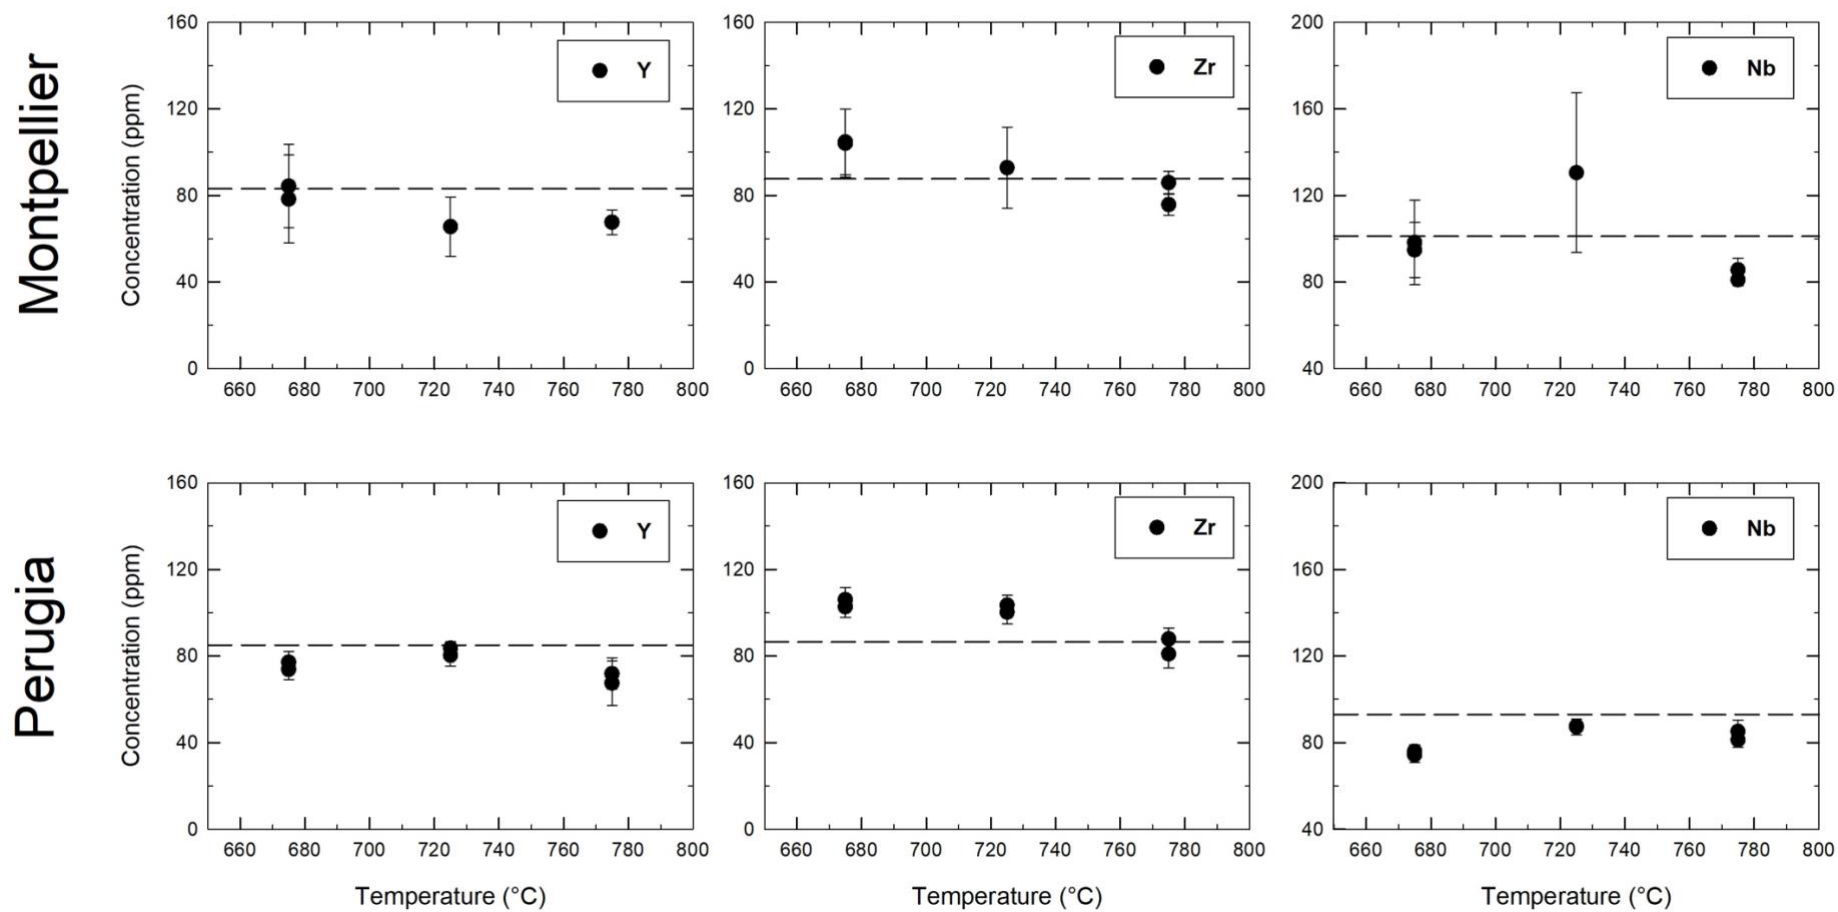

# Montpellier

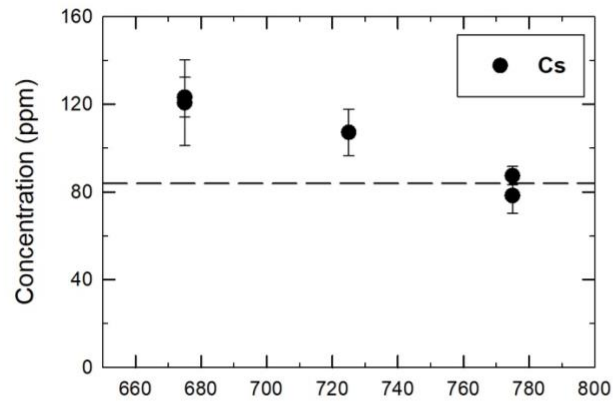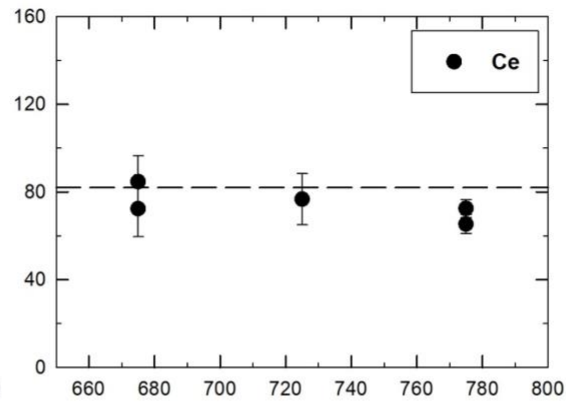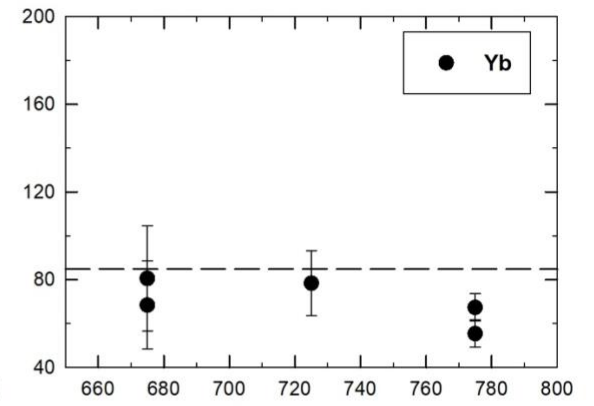

# Perugia

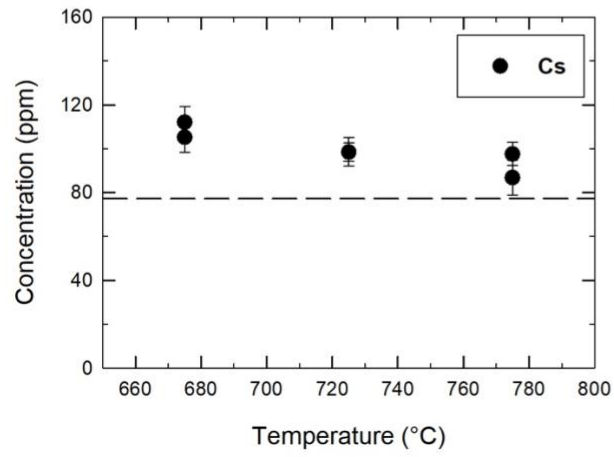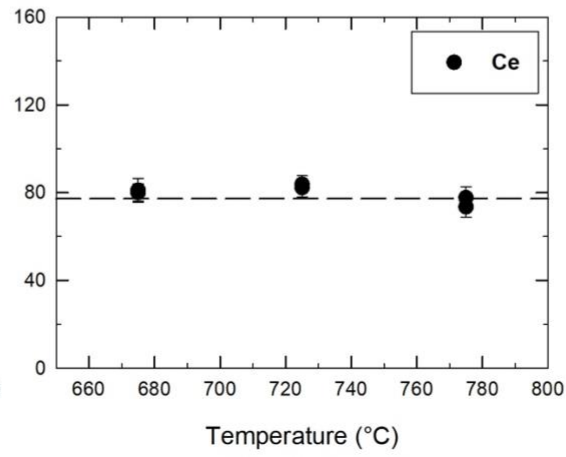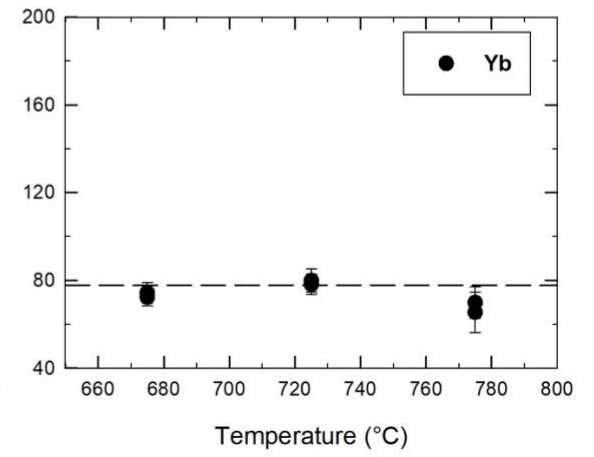

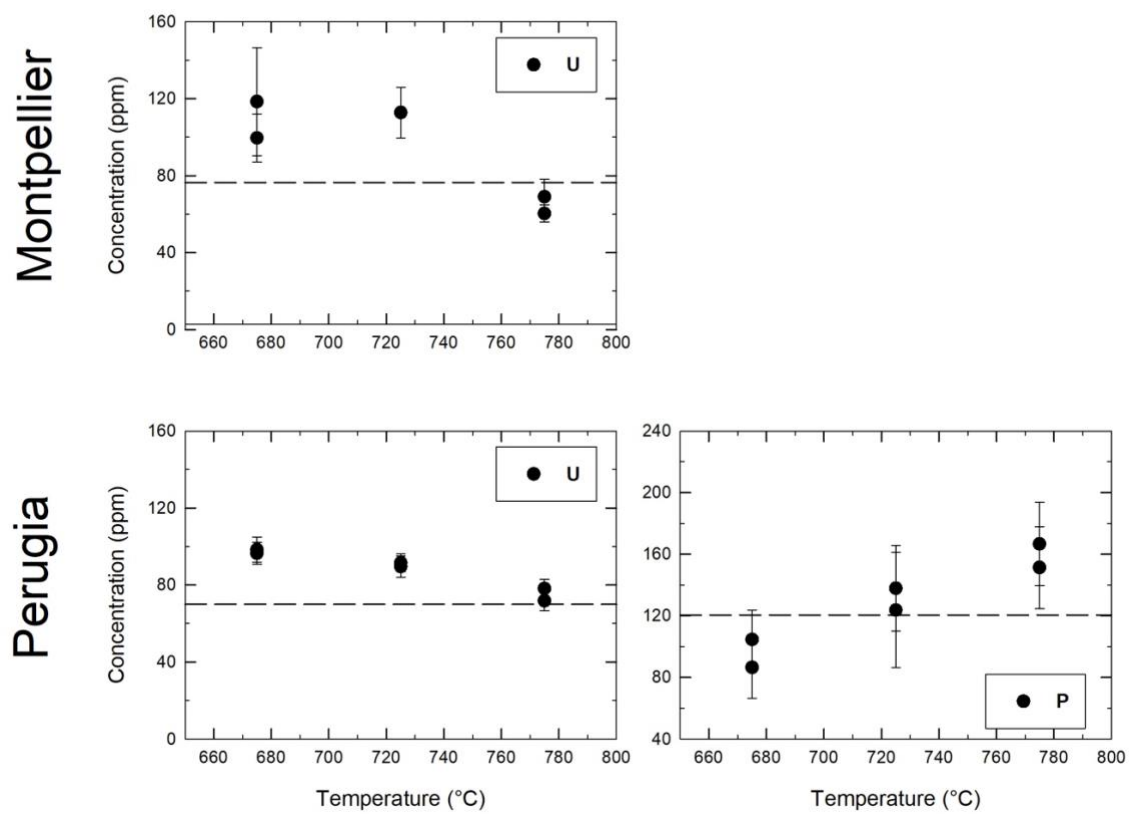

**Figure S3.** The trace element concentration in the glasses within the quartz traps (data obtained at Perugia and Montpellier labs). Please refer to main text for details.

**Figure S4**

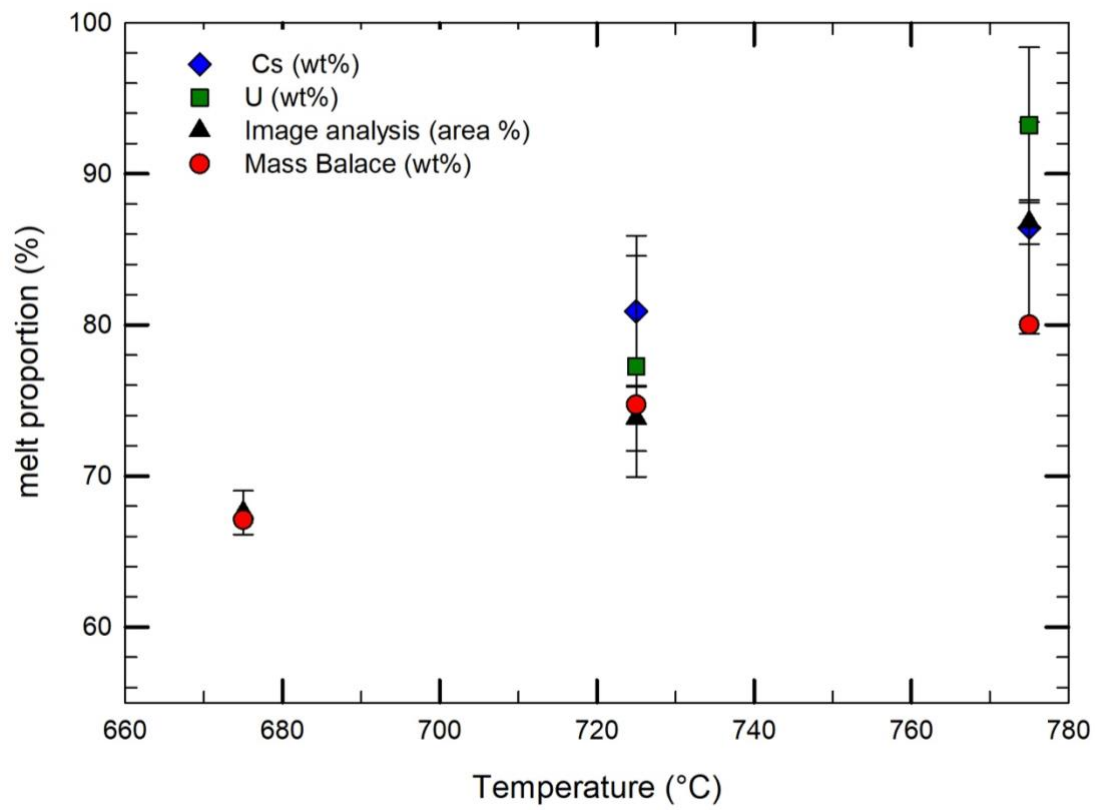

**Figure S4:** Melt proportion calculated via mass balance and image analysis and taking into account the U and Cs behaviour as strongly incompatible elements (see main text for details).
