# Supplementary material for: Trace element distribution between rhyolitic melts and minerals in highly crystalline assemblages: experimental approach using a quartz trap
Source: Copernicus journal article supplement (doi:10.5194/ejm-38-9-2026), 2026-01-07
Supplement: Supplementary file 1 [file Supplementary Material Tables S6.xlsx]

## Sheet: Y
Rock type	Mineral	Z	Element	Value	SD	low	High	Kd Type	Info	Reference
Rhyolite	Amphibole	39	Y			8.28	11	Phenocryst-Matrix, SIMS		Sisson 1994
Rhyolite	Biotite	39	Y			1	1.4	Phenocryst-Matrix		Nash & Crecraft 1985
Rhyolite	Clinopyroxene	39	Y			2.6	5.5	Phenocryst-Matrix		Sisson 1991
Rhyolite	Garnet	39	Y	130				Phenocryst-Matrix		Sisson & Bacon 1992
Rhyolite	Ilmenite	39	Y			0.2	1.6	Phenocryst-Matrix, PIXE		Stimac & Hickmott 1994
Rhyolite	Low Calcium Pyroxene	39	Y	0.5				Phenocryst-Matrix		Sisson 1991
Rhyolite	Low Calcium Pyroxene	39	Y			0.4	1.2	Phenocryst-Matrix, PIXE		Stimac & Hickmott 1994
Rhyolite	Plagioclase	39	Y			0.04	0.21	Phenocryst-Matrix		Nash & Crecraft 1985
Dacite	Amphibole	39	Y	2.46				Phenocryst-Matrix, SIMS		Sisson 1994
Dacite	Amphibole	39	Y	11.3				Phenocryst-Matrix		Ewart & Griffin 1994
Dacite	Biotite	39	Y	0.6				Phenocryst-Matrix		Ewart & Griffin 1994
Dacite	Plagioclase	39	Y	0.51				Phenocryst-Matrix		Ewart & Griffin 1994
Dacite-Tonalite	Pargasite, Amphibole	39	Y			1.3	3.1	Experimental		Hilyard et al. 2000
Per-Alkaline Rhyolite	Amphibole	39	Y	0.017				Phenocryst-Matrix		Ewart & Griffin 1994
Per-Alkaline Rhyolite	Clinopyroxene	39	Y			0.86	1.7	Phenocryst-Matrix		Ewart & Griffin 1994
Per-Alkaline Rhyolite	Ilmenite	39	Y				0.024	Phenocryst-Matrix		Ewart & Griffin 1994
Per-Alkaline Rhyolite	K-Feldspar	39	Y			0.021	0.028	Phenocryst-Matrix		Ewart & Griffin 1994
Per-Alkaline Rhyolite	Olivine	39	Y	0.12				Phenocryst-Matrix		Ewart & Griffin 1994
Per-Alkaline Trachyte	Clinopyroxene	39	Y			0.66	1.12	Phenocryst-Matrix		Larsen 1979
Per-Alkaline Trachyte	K-Feldspar	39	Y	0.017		0.017		Phenocryst-Matrix		Larsen 1979
Per-Alkaline Trachyte	Nepheline	39	Y	0.01				Phenocryst-Matrix		Larsen 1979
Per-Alkaline Trachyte	Olivine	39	Y	0.138				Phenocryst-Matrix		Larsen 1979
Per-Aluminous Granite	Apatite	39	Y	162				Phenocryst-Matrix		Bea et al. 1994
Per-Aluminous Granite	Biotite	39	Y	0.1				Phenocryst-Matrix		Bea et al. 1994
Per-Aluminous Granite	Cordierite	39	Y	0.72				Phenocryst-Matrix		Bea et al. 1994
Per-Aluminous Granite	K-Feldspar	39	Y	0.5		0.5		Phenocryst-Matrix		Bea et al. 1994
Per-Aluminous Granite	Plagioclase	39	Y	0.78				Phenocryst-Matrix		Bea et al. 1994
Per-Aluminous Granite	Zircon	39	Y	71.4				Phenocryst-Matrix		Bea et al. 1994
Topaz rhyolite	Sanidine	39	Y			0.01	0.03	Phenocryst-Matrix		Dailey et al. (2018)
Topaz rhyolite	Plagioclase	39	Y			0.01	0.03	Phenocryst-Matrix		Dailey et al. (2018)
Topaz rhyolite	Biotite	39	Y			0.09	0.16	Phenocryst-Matrix		Dailey et al. (2018)
Rhyolite (Fish Canyon Tuff)	Plagioclase	39	Y	0.02				Phenocryst-Matrix		Bachmann et al. (2005)
Rhyolite (Fish Canyon Tuff)	Sanidine	39	Y	0.1				Phenocryst-Matrix		Bachmann et al. (2005)
Rhyolite (Fish Canyon Tuff)	Biotite	39	Y	0.02				Phenocryst-Matrix		Bachmann et al. (2005)
Rhyolite (Fish Canyon Tuff)	Hornblende	39	Y	13.5				Phenocryst-Matrix		Bachmann et al. (2005)
Rhyolite (Fish Canyon Tuff)	Titanite	39	Y	633				Phenocryst-Matrix		Bachmann et al. (2005)
Rhyolite (Fish Canyon Tuff)	Zircon	39	Y	181				Phenocryst-Matrix		Bachmann et al. (2005)
Rhyolite (Fish Canyon Tuff)	Magnetite	39	Y	0.03				Phenocryst-Matrix		Bachmann et al. (2005)
Rhyolite (Peach Spring Tuff)	Titanite	39	Y	344				Phenocryst-Matrix		Padilla & Gualda (2016)
Rhyolite (Peach Spring Tuff)	Chevkinite	39	Y	140				Phenocryst-Matrix		Padilla & Gualda (2016)
Rhyolite (Peach Spring Tuff)	Zircon	39	Y	80				Phenocryst-Matrix		Padilla & Gualda (2016)
Rhyolite (Peach Spring Tuff)	Apatite	39	Y	135				Phenocryst-Matrix		Padilla & Gualda (2016)
Rhyolite (Peach Spring Tuff)	Amphibole	39	Y	6.72				Phenocryst-Matrix		Padilla & Gualda (2016)
Rhyolite (Peach Spring Tuff)	Biotite	39	Y	0.047				Phenocryst-Matrix		Padilla & Gualda (2016)
Rhyolite (Peach Spring Tuff)	Plagioclase	39	Y	0.011				Phenocryst-Matrix		Padilla & Gualda (2016)

## Sheet: Zr
Rock type	Mineral	Z	Element	Value	SD	low	High	Kd Type	Info	Reference
Dacite	Amphibole	40	Zr	0.34				Phenocryst-Matrix, SIMS		Sisson 1994
Dacite	Amphibole	40	Zr	0.93				Phenocryst-Matrix		Ewart & Griffin 1994
Dacite	Apatite	40	Zr	0.906				Experimental		Fujimaki 1986
Dacite	Biotite	40	Zr	0.59				Phenocryst-Matrix		Ewart & Griffin 1994
Dacite	Ca-Amphibole	40	Zr			0.26	0.68	Experimental		Klein et al. 1997
Dacite	Magnetite	40	Zr	3.9				Phenocryst-Matrix		Ewart & Griffin 1994
Dacite	Plagioclase	40	Zr	0.55				Phenocryst-Matrix		Ewart & Griffin 1994
High Na-Al Basalt	Clinopyroxene	40	Zr	0.27	0.03			Experimental		Blundy et al. 1998
High Na-Al Basalt	Plagioclase	40	Zr	0.006	0.005			Experimental		Blundy et al. 1998
High Silica Rhyolite	Allanite	40	Zr				0.29	Phenocryst-Matrix		Ewart & Griffin 1994
High Silica Rhyolite	Amphibole	40	Zr			0.69	0.76	Phenocryst-Matrix		Ewart & Griffin 1994
High Silica Rhyolite	Biotite	40	Zr	0.47				Phenocryst-Matrix		Ewart & Griffin 1994
High Silica Rhyolite	Clinopyroxene	40	Zr			1.51	4.28	Phenocryst-Matrix		Streck & Grunder 1997
High Silica Rhyolite	Ilmenite	40	Zr			1.98	10.4	Phenocryst-Matrix		Ewart & Griffin 1994
High Silica Rhyolite	K-Feldspar	40	Zr			0.005	0.21	Phenocryst-Matrix		Ewart & Griffin 1994
High Silica Rhyolite	Low Calcium Pyroxene	40	Zr	0.053				Phenocryst-Matrix		Ewart & Griffin 1994
High Silica Rhyolite	Magnetite	40	Zr	0.37		0.37		Phenocryst-Matrix		Ewart & Griffin 1994
High Silica Rhyolite	Magnetite	40	Zr			0.88	8.45	Phenocryst-Matrix		Streck & Grunder 1997
High Silica Rhyolite	Plagioclase	40	Zr			0.036	0.16	Phenocryst-Matrix		Ewart & Griffin 1994
Low Silica Rhyolite	Allanite	40	Zr	0.13				Phenocryst-Matrix		Ewart & Griffin 1994
Low Silica Rhyolite	Amphibole	40	Zr			0.53	0.91	Phenocryst-Matrix		Ewart & Griffin 1994
Low Silica Rhyolite	Biotite	40	Zr	0.19				Phenocryst-Matrix		Ewart & Griffin 1994
Low Silica Rhyolite	Clinopyroxene	40	Zr			0.17	1.2	Phenocryst-Matrix		Ewart & Griffin 1994
Low Silica Rhyolite	Ilmenite	40	Zr			0.49	1.38	Phenocryst-Matrix		Ewart & Griffin 1994
Low Silica Rhyolite	K-Feldspar	40	Zr			0.018	0.069	Phenocryst-Matrix		Ewart & Griffin 1994
Low Silica Rhyolite	Low Calcium Pyroxene	40	Zr			0.075	0.086	Phenocryst-Matrix		Ewart & Griffin 1994
Low Silica Rhyolite	Magnetite	40	Zr			0.034	0.24	Phenocryst-Matrix		Ewart & Griffin 1994
Low Silica Rhyolite	Plagioclase	40	Zr			0.1	0.18	Phenocryst-Matrix		Ewart & Griffin 1994
Rhyolite	Amphibole	40	Zr			0.27	0.59	Phenocryst-Matrix, SIMS		Sisson 1994
Rhyolite	Amphibole	40	Zr	0.5				Phenocryst-Matrix		Bacon & Druitt 1988
Rhyolite	Biotite	40	Zr			0.79	1.8	Phenocryst-Matrix		Nash & Crecraft 1985
Rhyolite	Clinopyroxene	40	Zr			0.2	0.33	Phenocryst-Matrix		Sisson 1991
Rhyolite	Clinopyroxene	40	Zr	0.29				Phenocryst-Matrix		Bacon & Druitt 1988
Rhyolite	Garnet	40	Zr	0.4				Phenocryst-Matrix		Sisson & Bacon 1992
Rhyolite	K-Feldspar	40	Zr	0.36		0.36		Phenocryst-Matrix		Leeman & Phelps 1981
Rhyolite	K-Feldspar	40	Zr			0.01	0.05	Phenocryst-Matrix		Nash & Crecraft 1985
Rhyolite	Low Calcium Pyroxene	40	Zr			0.01	0.03	Phenocryst-Matrix, PIXE		Stimac & Hickmott 1994
Rhyolite	Low Calcium Pyroxene	40	Zr	0.009				Phenocryst-Matrix		Sisson 1991
Rhyolite	Low Calcium Pyroxene	40	Zr	0.11				Phenocryst-Matrix		Bacon & Druitt 1988
Rhyolite	Magnetite	40	Zr	0.24				Phenocryst-Matrix		Bacon & Druitt 1988
Rhyolite	Plagioclase	40	Zr	0.2				Phenocryst-Matrix		Bacon & Druitt 1988
Rhyolite	Plagioclase	40	Zr			0.04	0.36	Phenocryst-Matrix		Nash & Crecraft 1985
Macusani ash-flow tuffs (peraluminous)	Quartz	40	Zr	0.0004				Phenocryst-Matrix		Pichavant et al. (2024)
Macusani ash-flow tuffs (peraluminous)	Plagioclase	40	Zr	0.003				Phenocryst-Matrix		Pichavant et al. (2024)
Macusani ash-flow tuffs (peraluminous)	Alkalifeldspar	40	Zr	0.0003				Phenocryst-Matrix		Pichavant et al. (2024)
Macusani ash-flow tuffs (peraluminous)	Biotite	40	Zr	0.14				Phenocryst-Matrix		Pichavant et al. (2024)
Macusani ash-flow tuffs (peraluminous)	Muscovite	40	Zr	0.21				Phenocryst-Matrix		Pichavant et al. (2024)
Macusani ash-flow tuffs (peraluminous)	Ilmenite	40	Zr	1.39				Phenocryst-Matrix		Pichavant et al. (2024)
Topaz rhyolite	Sanidine	40	Zr			0.02	0.03	Phenocryst-Matrix		Dailey et al. (2018)
Topaz rhyolite	Plagioclase	40	Zr			0.01	0.05	Phenocryst-Matrix		Dailey et al. (2018)
Topaz rhyolite	Biotite	40	Zr			0.08	0.12	Phenocryst-Matrix		Dailey et al. (2018)
Rhyolite (Fish Canyon Tuff)	Plagioclase	40	Zr				0.01	Phenocryst-Matrix		Bachmann et al. (2005)
Rhyolite (Fish Canyon Tuff)	Sanidine	40	Zr				0.01	Phenocryst-Matrix		Bachmann et al. (2005)
Rhyolite (Fish Canyon Tuff)	Biotite	40	Zr	0.05				Phenocryst-Matrix		Bachmann et al. (2005)
Rhyolite (Fish Canyon Tuff)	Hornblende	40	Zr	0.5				Phenocryst-Matrix		Bachmann et al. (2005)
Rhyolite (Fish Canyon Tuff)	Titanite	40	Zr	9.64				Phenocryst-Matrix		Bachmann et al. (2005)
Rhyolite (Fish Canyon Tuff)	Zircon	40	Zr	1043				Phenocryst-Matrix		Bachmann et al. (2005)
Rhyolite (Fish Canyon Tuff)	Magnetite	40	Zr	0.05				Phenocryst-Matrix		Bachmann et al. (2005)
Rhyolite (Peach Spring Tuff)	Titanite	40	Zr	8.66				Phenocryst-Matrix		Padilla & Gualda (2016)
Rhyolite (Peach Spring Tuff)	Chevkinite	40	Zr	57				Phenocryst-Matrix		Padilla & Gualda (2016)
Rhyolite (Peach Spring Tuff)	Zircon	40	Zr	3653				Phenocryst-Matrix		Padilla & Gualda (2016)
Rhyolite (Peach Spring Tuff)	Apatite	40	Zr	1.62				Phenocryst-Matrix		Padilla & Gualda (2016)
Rhyolite (Peach Spring Tuff)	Amphibole	40	Zr	0.397				Phenocryst-Matrix		Padilla & Gualda (2016)
Rhyolite (Peach Spring Tuff)	Biotite	40	Zr	0.052				Phenocryst-Matrix		Padilla & Gualda (2016)
Rhyolite (Peach Spring Tuff)	Sanidine	40	Zr	0.005				Phenocryst-Matrix		Padilla & Gualda (2016)
Rhyolite (Peach Spring Tuff)	Plagioclase	40	Zr	0.004				Phenocryst-Matrix		Padilla & Gualda (2016)
Granite	Biotite	40	Zr	0.42				Experimental		Were & Kepler (2021)

## Sheet: Nb
Rock type	Mineral	Z	Element	Value	SD	low	High	Kd Type	Info	Reference
Dacite	Amphibole	41	Nb			2.5		Phenocryst-Matrix		Ewart & Griffin 1994
Dacite	Biotite	41	Nb			7.5		Phenocryst-Matrix		Ewart & Griffin 1994
Dacite	Ca-Amphibole	41	Nb			0.28	0.39	Experimental		Klein et al. 1997
Dacite	Plagioclase	41	Nb				2.5	Phenocryst-Matrix		Ewart & Griffin 1994
Dacite-Tonalite	Pargasite, Amphibole	41	Nb			0.2	1	Experimental		Hilyard et al. 2000
Low Silica Rhyolite	Allanite	41	Nb	0.12				Phenocryst-Matrix		Ewart & Griffin 1994
Low Silica Rhyolite	Amphibole	41	Nb			1.5	6.7	Phenocryst-Matrix		Ewart & Griffin 1994
Low Silica Rhyolite	Biotite	41	Nb	4.6				Phenocryst-Matrix		Ewart & Griffin 1994
Low Silica Rhyolite	Clinopyroxene	41	Nb			0.2	1	Phenocryst-Matrix		Ewart & Griffin 1994
Low Silica Rhyolite	Ilmenite	41	Nb			6.58	89.1	Phenocryst-Matrix		Ewart & Griffin 1994
Low Silica Rhyolite	K-Feldspar	41	Nb			0.01	0.15	Phenocryst-Matrix		Ewart & Griffin 1994
Low Silica Rhyolite	Low Calcium Pyroxene	41	Nb			0.54	0.73	Phenocryst-Matrix		Ewart & Griffin 1994
Low Silica Rhyolite	Plagioclase	41	Nb			0.26	0.88	Phenocryst-Matrix		Ewart & Griffin 1994
Per-Alkaline Rhyolite	Amphibole	41	Nb	0.76				Phenocryst-Matrix		Ewart & Griffin 1994
Per-Alkaline Rhyolite	Clinopyroxene	41	Nb			0.028	0.036	Phenocryst-Matrix		Ewart & Griffin 1994
Per-Alkaline Rhyolite	Ilmenite	41	Nb	11.6				Phenocryst-Matrix		Ewart & Griffin 1994
Per-Alkaline Rhyolite	K-Feldspar	41	Nb			3.4	4.8	Phenocryst-Matrix		Ewart & Griffin 1994
Per-Alkaline Rhyolite	Olivine	41	Nb				0.049	Phenocryst-Matrix		Ewart & Griffin 1994
Macusani ash-flow tuffs (peraluminous)	Quartz	41	Nb	0.0001				Phenocryst-Matrix		Pichavant et al. (2024)
Macusani ash-flow tuffs (peraluminous)	Plagioclase	41	Nb	0.003				Phenocryst-Matrix		Pichavant et al. (2024)
Macusani ash-flow tuffs (peraluminous)	Alkalifeldspar	41	Nb	0.0003				Phenocryst-Matrix		Pichavant et al. (2024)
Macusani ash-flow tuffs (peraluminous)	Biotite	41	Nb	9.75				Phenocryst-Matrix		Pichavant et al. (2024)
Macusani ash-flow tuffs (peraluminous)	Muscovite	41	Nb	4.6				Phenocryst-Matrix		Pichavant et al. (2024)
Macusani ash-flow tuffs (peraluminous)	Andalusite	41	Nb	0.01				Phenocryst-Matrix		Pichavant et al. (2024)
Macusani ash-flow tuffs (peraluminous)	Ilmenite	41	Nb	91.2				Phenocryst-Matrix		Pichavant et al. (2024)
Topaz rhyolite	Sanidine	41	Nb			0.02	0.03	Phenocryst-Matrix		Dailey et al. (2018)
Topaz rhyolite	Plagioclase	41	Nb			0.03	0.09	Phenocryst-Matrix		Dailey et al. (2018)
Topaz rhyolite	Biotite	41	Nb			7.96	8.78	Phenocryst-Matrix		Dailey et al. (2018)
Rhyolite (Fish Canyon Tuff)	Plagioclase	41	Nb				0.01	Phenocryst-Matrix		Bachmann et al. (2005)
Rhyolite (Fish Canyon Tuff)	Sanidine	41	Nb				0.01	Phenocryst-Matrix		Bachmann et al. (2005)
Rhyolite (Fish Canyon Tuff)	Biotite	41	Nb	2.9				Phenocryst-Matrix		Bachmann et al. (2005)
Rhyolite (Fish Canyon Tuff)	Hornblende	41	Nb	2				Phenocryst-Matrix		Bachmann et al. (2005)
Rhyolite (Fish Canyon Tuff)	Titanite	41	Nb	129				Phenocryst-Matrix		Bachmann et al. (2005)
Rhyolite (Fish Canyon Tuff)	Zircon	41	Nb	2.09				Phenocryst-Matrix		Bachmann et al. (2005)
Rhyolite (Fish Canyon Tuff)	Magnetite	41	Nb	0.37				Phenocryst-Matrix		Bachmann et al. (2005)
Rhyolite (Peach Spring Tuff)	Titanite	41	Nb	61				Phenocryst-Matrix		Padilla & Gualda (2016)
Rhyolite (Peach Spring Tuff)	Chevkinite	41	Nb	21				Phenocryst-Matrix		Padilla & Gualda (2016)
Rhyolite (Peach Spring Tuff)	Zircon	41	Nb	0.267				Phenocryst-Matrix		Padilla & Gualda (2016)
Rhyolite (Peach Spring Tuff)	Apatite	41	Nb	54				Phenocryst-Matrix		Padilla & Gualda (2016)
Rhyolite (Peach Spring Tuff)	Amphibole	41	Nb	1.07				Phenocryst-Matrix		Padilla & Gualda (2016)
Rhyolite (Peach Spring Tuff)	Biotite	41	Nb	1.56				Phenocryst-Matrix		Padilla & Gualda (2016)
Granite	Biotite	41	Nb	3.69				Experimental		Were & Kepler (2021)

## Sheet: Cs
Rock type	Mineral	Z	Element	Value	SD	low	High	Kd Type	Info	Reference
Dacite	Biotite	55	Cs	2.35				Phenocryst-Matrix		Matsui et al. 1977
Dacite	Biotite	55	Cs	2.02				Phenocryst-Matrix		Higuchi & Nagasawa 1969
Dacite	Plagioclase	55	Cs			0.03	0.78	Phenocryst-Matrix		Dudas et al. 1971
High Aluminium Rhyolite	Cordierite	55	Cs			0.28	0.34	Experimental		Evensen & London 2003
High Silica Rhyolite	Biotite	55	Cs			1.2	3.1	Phenocryst-Matrix		Mahood & Hildreth 1983
High Silica Rhyolite	K-Feldspar	55	Cs			0.009	0.061	Phenocryst-Matrix		Mahood & Hildreth 1983
High Silica Rhyolite	K-Feldspar	55	Cs			0.002	0.061	Phenocryst-Matrix		Stix & Gorton 1990
High Silica Rhyolite	Plagioclase	55	Cs			0.025	0.084	Phenocryst-Matrix		Streck & Grunder 1997
Per-Aluminous Granite	Biotite	55	Cs	26.8				Phenocryst-Matrix		Bea et al. 1994
Per-Aluminous Granite	Cordierite	55	Cs	31.5				Phenocryst-Matrix		Bea et al. 1994
Per-Aluminous Granite	K-Feldspar	55	Cs	4.2		4.2		Phenocryst-Matrix		Bea et al. 1994
Per-Aluminous Granite	Plagioclase	55	Cs	0.44				Phenocryst-Matrix		Bea et al. 1994
Rhyolite	Alkali Feldspar	55	Cs			0.09	0.13	Experimental		Icenhower & London 1996
Rhyolite	Amphibole	55	Cs	0.01				Phenocryst-Matrix		Bacon & Druitt 1988
Rhyolite	Biotite	55	Cs			1.2	4.4	Phenocryst-Matrix		Nash & Crecraft 1985
Rhyolite	Clinopyroxene	55	Cs	0.01				Phenocryst-Matrix		Bacon & Druitt 1988
Rhyolite	K-Feldspar	55	Cs	0.024		0.024		Phenocryst-Matrix		Leeman & Phelps 1981
Rhyolite	K-Feldspar	55	Cs			0.11	0.37	Phenocryst-Matrix		Nash & Crecraft 1985
Rhyolite	Low Calcium Pyroxene	55	Cs			0.44	0.77	Phenocryst-Matrix		Nash & Crecraft 1985
Rhyolite	Low Calcium Pyroxene	55	Cs	0.01				Phenocryst-Matrix		Bacon & Druitt 1988
Rhyolite	Magnetite	55	Cs	0.01				Phenocryst-Matrix		Bacon & Druitt 1988
Rhyolite	Plagioclase	55	Cs	0.03				Phenocryst-Matrix		Bacon & Druitt 1988
Rhyolite	Plagioclase	55	Cs			0.02	0.18	Phenocryst-Matrix		Nash & Crecraft 1985
Rhyolite-Dacite	K-Feldspar	55	Cs			0.11	0.16	Phenocryst-Matrix		Stix & Gorton 1990
Macusani ash-flow tuffs (peraluminous)	Quartz	55	Cs	0.001				Phenocryst-Matrix		Pichavant et al. (2024)
Macusani ash-flow tuffs (peraluminous)	Plagioclase	55	Cs	0.0007				Phenocryst-Matrix		Pichavant et al. (2024)
Macusani ash-flow tuffs (peraluminous)	Alkalifeldspar	55	Cs	0.03				Phenocryst-Matrix		Pichavant et al. (2024)
Macusani ash-flow tuffs (peraluminous)	Biotite	55	Cs	0.46				Phenocryst-Matrix		Pichavant et al. (2024)
Macusani ash-flow tuffs (peraluminous)	Muscovite	55	Cs	0.08				Phenocryst-Matrix		Pichavant et al. (2024)
Macusani ash-flow tuffs (peraluminous)	Andalusite	55	Cs	0.002				Phenocryst-Matrix		Pichavant et al. (2024)
Macusani ash-flow tuffs (peraluminous)	Ilmenite	55	Cs	0.0005				Phenocryst-Matrix		Pichavant et al. (2024)
Topaz rhyolite	Sanidine	55	Cs			0.07	0.17	Phenocryst-Matrix		Dailey et al. (2018)
Topaz rhyolite	Plagioclase	55	Cs			0.13	0.22	Phenocryst-Matrix		Dailey et al. (2018)
Topaz rhyolite	Biotite	55	Cs			0.28	0.8	Phenocryst-Matrix		Dailey et al. (2018)
Rhyolite (Fish Canyon Tuff)	Plagioclase	55	Cs				0.01	Phenocryst-Matrix		Bachmann et al. (2005)
Rhyolite (Fish Canyon Tuff)	Sanidine	55	Cs	0.02				Phenocryst-Matrix		Bachmann et al. (2005)
Rhyolite (Fish Canyon Tuff)	Biotite	55	Cs	0.5				Phenocryst-Matrix		Bachmann et al. (2005)
Rhyolite (Fish Canyon Tuff)	Hornblende	55	Cs	0.01				Phenocryst-Matrix		Bachmann et al. (2005)
Rhyolite (Fish Canyon Tuff)	Titanite	55	Cs				0.01	Phenocryst-Matrix		Bachmann et al. (2005)
Rhyolite (Peach Spring Tuff)	Apatite	55	Cs	84				Phenocryst-Matrix		Padilla & Gualda (2016)
Rhyolite (Peach Spring Tuff)	Biotite	55	Cs	0.43				Phenocryst-Matrix		Padilla & Gualda (2016)
Rhyolite (Peach Spring Tuff)	Sanidine	55	Cs	0.013				Phenocryst-Matrix		Padilla & Gualda (2016)
Rhyolite (Peach Spring Tuff)	Plagioclase	55	Cs	0.017				Phenocryst-Matrix		Padilla & Gualda (2016)
Granite	Biotite	55	Cs	0.62				Experimental		Were & Kepler (2021)

## Sheet: Ce
Rock type	Mineral	Z	Element	Value	SD	low	High	Kd Type	Info	Reference
Dacite	Amphibole	58	Ce	0.63				Phenocryst-Matrix, SIMS		Sisson 1994
Dacite	Amphibole	58	Ce			0.429	1.77	Phenocryst-Matrix		Nagasawa & Schnetzler 1971
Dacite	Apatite	58	Ce	37.4				Experimental		Fujimaki 1986
Dacite	Apatite	58	Ce			18	52.5	Phenocryst-Matrix		Nagasawa 1970
Dacite	Apatite	58	Ce	16.6				Phenocryst-Matrix		Nagasawa & Schnetzler 1971
Dacite	Biotite	58	Ce	0.037				Phenocryst-Matrix		Schnetzler & Philpotts 1970
Dacite	Biotite	58	Ce	0.318				Phenocryst-Matrix		Higuchi & Nagasawa 1969
Dacite	Biotite	58	Ce	0.377				Phenocryst-Matrix		Matsui et al. 1977
Dacite	Ca-Amphibole	58	Ce			0.24	0.73	Experimental		Klein et al. 1997
Dacite	Garnet	58	Ce	0.348				Phenocryst-Matrix		Schnetzler & Philpotts 1970
Dacite	Garnet	58	Ce	0.53				Phenocryst-Matrix		Irving & Frey 1978
Dacite	Garnet	58	Ce	0.68				Experimental		Irving & Frey 1976
Dacite	Low Calcium Pyroxene	58	Ce			0.082	0.262	Phenocryst-Matrix		Nagasawa & Schnetzler 1971
Dacite	Low Calcium Pyroxene	58	Ce	0.362				Phenocryst-Matrix		Nagasawa & Schnetzler 1971
Dacite	Plagioclase	58	Ce			0.109	0.347	Phenocryst-Matrix		Nagasawa & Schnetzler 1971
Dacite	Plagioclase	58	Ce	0.241				Phenocryst-Matrix		Schnetzler & Philpotts 1970
Dacite	Plagioclase	58	Ce			0.164	0.4	Phenocryst-Matrix		Dudas et al. 1971
Dacite	Zircon	58	Ce	1.17				Experimental		Fujimaki 1986
Dacite	Zircon	58	Ce			2.29	7.38	Phenocryst-Matrix		Nagasawa 1970
High Silica Rhyolite	Allanite	58	Ce			2063	2494	Phenocryst-Matrix		Mahood & Hildreth 1983
High Silica Rhyolite	Biotite	58	Ce			2.15	3.49	Phenocryst-Matrix		Mahood & Hildreth 1983
High Silica Rhyolite	Clinopyroxene	58	Ce			3.5	21.6	Phenocryst-Matrix		Mahood & Hildreth 1983
High Silica Rhyolite	Clinopyroxene	58	Ce			1.54	10.71	Phenocryst-Matrix		Streck & Grunder 1997
High Silica Rhyolite	Fayalite, Olivine	58	Ce			0.93	20.4	Phenocryst-Matrix		Mahood & Hildreth 1983
High Silica Rhyolite	Fayalite, Olivine	58	Ce			3.5	29	Phenocryst-Matrix		Michael 1988
High Silica Rhyolite	Ferrohedenbergite, Clinopyroxene	58	Ce			5.2	32	Phenocryst-Matrix		Michael 1988
High Silica Rhyolite	Ilmenite	58	Ce	1.19				Phenocryst-Matrix		Mahood & Hildreth 1983
High Silica Rhyolite	K-Feldspar	58	Ce			0.031	0.095	Phenocryst-Matrix		Mahood & Hildreth 1983
High Silica Rhyolite	K-Feldspar	58	Ce			0.017	0.095	Phenocryst-Matrix		Stix & Gorton 1990
High Silica Rhyolite	Low Calcium Pyroxene	58	Ce			9	15.6	Phenocryst-Matrix		Mahood & Hildreth 1983
High Silica Rhyolite	Magnetite	58	Ce			9.7	26	Phenocryst-Matrix		Mahood & Hildreth 1983
High Silica Rhyolite	Magnetite	58	Ce			0.2	1.03	Phenocryst-Matrix		Streck & Grunder 1997
High Silica Rhyolite	Plagioclase	58	Ce			0.032	0.104	Phenocryst-Matrix		Streck & Grunder 1997
High Silica Rhyolite	Zircon	58	Ce			10	23.5	Phenocryst-Matrix		Mahood & Hildreth 1983
Rhyolite	Amphibole	58	Ce			2.13	4.23	Phenocryst-Matrix, SIMS		Sisson 1994
Rhyolite	Amphibole	58	Ce	0.68				Phenocryst-Matrix		Bacon & Druitt 1988
Rhyolite	Biotite	58	Ce			0.86	11	Phenocryst-Matrix		Nash & Crecraft 1985
Rhyolite	Biotite	58	Ce	0.234				Phenocryst-Matrix		Schnetzler & Philpotts 1970
Rhyolite	Clinopyroxene	58	Ce	0.646				Phenocryst-Matrix		Schnetzler & Philpotts 1970
Rhyolite	Clinopyroxene	58	Ce			1.2	2.9	Phenocryst-Matrix		Nash & Crecraft 1985
Rhyolite	Clinopyroxene	58	Ce	0.84				Phenocryst-Matrix		Bacon & Druitt 1988
Rhyolite	Clinopyroxene	58	Ce			1.1	2.5	Phenocryst-Matrix		Sisson 1991
Rhyolite	Garnet	58	Ce			0.79	0.93	Phenocryst-Matrix		Irving & Frey 1978
Rhyolite	Garnet	58	Ce	0.01				Phenocryst-Matrix		Sisson & Bacon 1992
Rhyolite	Ilmenite	58	Ce	7.8				Phenocryst-Matrix		Nash & Crecraft 1985
Rhyolite	K-Feldspar	58	Ce	0.065		0.065		Phenocryst-Matrix		Leeman & Phelps 1981
Rhyolite	K-Feldspar	58	Ce			0.02	0.06	Phenocryst-Matrix		Nash & Crecraft 1985
Rhyolite	K-Feldspar	58	Ce	0.044		0.044		Phenocryst-Matrix		Schnetzler & Philpotts 1970
Rhyolite	Low Calcium Pyroxene	58	Ce			0.87	0.99	Phenocryst-Matrix		Nash & Crecraft 1985
Rhyolite	Low Calcium Pyroxene	58	Ce	0.46				Phenocryst-Matrix		Bacon & Druitt 1988
Rhyolite	Low Calcium Pyroxene	58	Ce	0.006				Phenocryst-Matrix		Sisson 1991
Rhyolite	Magnetite	58	Ce	0.71				Phenocryst-Matrix		Bacon & Druitt 1988
Rhyolite	Magnetite	58	Ce			1.02	2.7	Phenocryst-Matrix		Nash & Crecraft 1985
Rhyolite	Plagioclase	58	Ce	0.22				Phenocryst-Matrix		Bacon & Druitt 1988
Rhyolite	Plagioclase	58	Ce			0.21	0.34	Phenocryst-Matrix		Nash & Crecraft 1985
Rhyolite-Dacite	Garnet	58	Ce	0.51				Phenocryst-Matrix		Irving & Frey 1978
Rhyolite-Dacite	K-Feldspar	58	Ce			0.02	0.04	Phenocryst-Matrix		Stix & Gorton 1990
Topaz rhyolite	Sanidine	58	Ce			0.05	0.1	Phenocryst-Matrix		Dailey et al. (2018)
Topaz rhyolite	Plagioclase	58	Ce			0.11	0.23	Phenocryst-Matrix		Dailey et al. (2018)
Topaz rhyolite	Biotite	58	Ce			0.03	0.32	Phenocryst-Matrix		Dailey et al. (2018)
Rhyolite (Fish Canyon Tuff)	Plagioclase	58	Ce	0.3				Phenocryst-Matrix		Bachmann et al. (2005)
Rhyolite (Fish Canyon Tuff)	Sanidine	58	Ce	0.02				Phenocryst-Matrix		Bachmann et al. (2005)
Rhyolite (Fish Canyon Tuff)	Biotite	58	Ce	0.01				Phenocryst-Matrix		Bachmann et al. (2005)
Rhyolite (Fish Canyon Tuff)	Hornblende	58	Ce	3.2				Phenocryst-Matrix		Bachmann et al. (2005)
Rhyolite (Fish Canyon Tuff)	Titanite	58	Ce	223				Phenocryst-Matrix		Bachmann et al. (2005)
Rhyolite (Fish Canyon Tuff)	Zircon	58	Ce	1.1				Phenocryst-Matrix		Bachmann et al. (2005)
Rhyolite (Fish Canyon Tuff)	Magnetite	58	Ce	0.01				Phenocryst-Matrix		Bachmann et al. (2005)
Rhyolite (Peach Spring Tuff)	Titanite	58	Ce	160				Phenocryst-Matrix		Padilla & Gualda (2016)
Rhyolite (Peach Spring Tuff)	Chevkinite	58	Ce	3310				Phenocryst-Matrix		Padilla & Gualda (2016)
Rhyolite (Peach Spring Tuff)	Zircon	58	Ce	0.703				Phenocryst-Matrix		Padilla & Gualda (2016)
Rhyolite (Peach Spring Tuff)	Apatite	58	Ce	133				Phenocryst-Matrix		Padilla & Gualda (2016)
Rhyolite (Peach Spring Tuff)	Amphibole	58	Ce	1.99				Phenocryst-Matrix		Padilla & Gualda (2016)
Rhyolite (Peach Spring Tuff)	Biotite	58	Ce	0.032				Phenocryst-Matrix		Padilla & Gualda (2016)
Rhyolite (Peach Spring Tuff)	Sanidine	58	Ce	0.031				Phenocryst-Matrix		Padilla & Gualda (2016)
Rhyolite (Peach Spring Tuff)	Plagioclase	58	Ce	0.189				Phenocryst-Matrix		Padilla & Gualda (2016)
Granite	Biotite	58	Ce	0.32				Experimental		Were & Kepler (2021)

## Sheet: Yb
Rock type	Mineral	Z	Element	Value	SD	low	High	Kd Type	Info	Reference
Dacite	Amphibole	70	Yb	1.31				Phenocryst-Matrix, SIMS		Sisson 1994
Dacite	Amphibole	70	Yb			1.89	9	Phenocryst-Matrix		Nagasawa & Schnetzler 1971
Dacite	Apatite	70	Yb	27.6				Experimental		Fujimaki 1986
Dacite	Apatite	70	Yb			13.1	37	Phenocryst-Matrix		Nagasawa 1970
Dacite	Apatite	70	Yb	9.4				Phenocryst-Matrix		Nagasawa & Schnetzler 1971
Dacite	Biotite	70	Yb	0.179				Phenocryst-Matrix		Schnetzler & Philpotts 1970
Dacite	Biotite	70	Yb	0.44				Phenocryst-Matrix		Higuchi & Nagasawa 1969
Dacite	Biotite	70	Yb	0.67				Phenocryst-Matrix		Matsui et al. 1977
Dacite	Ca-Amphibole	70	Yb			1.15	2.1	Experimental		Klein et al. 1997
Dacite	Garnet	70	Yb	39.9				Phenocryst-Matrix		Schnetzler & Philpotts 1970
Dacite	Garnet	70	Yb	26				Phenocryst-Matrix		Irving & Frey 1978
Dacite	Garnet	70	Yb	234				Phenocryst-Matrix		Irving & Frey 1976
Dacite	Low Calcium Pyroxene	70	Yb			0.73	0.99	Phenocryst-Matrix		Nagasawa & Schnetzler 1971
Dacite	Low Calcium Pyroxene	70	Yb	2.01				Phenocryst-Matrix		Nagasawa & Schnetzler 1971
Dacite	Plagioclase	70	Yb			0.022	0.302	Phenocryst-Matrix		Nagasawa & Schnetzler 1971
Dacite	Plagioclase	70	Yb	0.077				Phenocryst-Matrix		Schnetzler & Philpotts 1970
Dacite	Plagioclase	70	Yb			0.07	0.11	Phenocryst-Matrix		Dudas et al. 1971
Dacite	Zircon	70	Yb	516				Experimental		Fujimaki 1986
High Silica Rhyolite	Allanite	70	Yb			24.5	37	Phenocryst-Matrix		Mahood & Hildreth 1983
High Silica Rhyolite	Biotite	70	Yb			0.32	0.69	Phenocryst-Matrix		Mahood & Hildreth 1983
High Silica Rhyolite	Clinopyroxene	70	Yb			4.5	6.4	Phenocryst-Matrix		Mahood & Hildreth 1983
High Silica Rhyolite	Clinopyroxene	70	Yb			4.72	6.14	Phenocryst-Matrix		Streck & Grunder 1997
High Silica Rhyolite	Fayalite, Olivine	70	Yb			1.4	3.7	Phenocryst-Matrix		Michael 1988
High Silica Rhyolite	Fayalite, Olivine	70	Yb			0.92	1.96	Phenocryst-Matrix		Mahood & Hildreth 1983
High Silica Rhyolite	Ferrohedenbergite, Clinopyroxene	70	Yb			5.1	8.3	Phenocryst-Matrix		Michael 1988
High Silica Rhyolite	Ilmenite	70	Yb	0.55				Phenocryst-Matrix		Mahood & Hildreth 1983
High Silica Rhyolite	K-Feldspar	70	Yb			0.005	0.024	Phenocryst-Matrix		Mahood & Hildreth 1983
High Silica Rhyolite	K-Feldspar	70	Yb			0.002	0.024	Phenocryst-Matrix		Stix & Gorton 1990
High Silica Rhyolite	Low Calcium Pyroxene	70	Yb			2.1	5	Phenocryst-Matrix		Mahood & Hildreth 1983
High Silica Rhyolite	Magnetite	70	Yb	1.34				Phenocryst-Matrix		Mahood & Hildreth 1983
High Silica Rhyolite	Magnetite	70	Yb			0.09	1.28	Phenocryst-Matrix		Streck & Grunder 1997
High Silica Rhyolite	Plagioclase	70	Yb			0.012	0.026	Phenocryst-Matrix		Streck & Grunder 1997
High Silica Rhyolite	Zircon	70	Yb			490	564	Phenocryst-Matrix		Mahood & Hildreth 1983
Rhyolite	Amphibole	70	Yb	1.8				Phenocryst-Matrix		Bacon & Druitt 1988
Rhyolite	Amphibole	70	Yb			4.41	5.5	Phenocryst-Matrix, SIMS		Sisson 1994
Rhyolite	Biotite	70	Yb			0.6	3	Phenocryst-Matrix		Nash & Crecraft 1985
Rhyolite	Biotite	70	Yb	0.165				Phenocryst-Matrix		Schnetzler & Philpotts 1970
Rhyolite	Clinopyroxene	70	Yb	3				Phenocryst-Matrix		Bacon & Druitt 1988
Rhyolite	Clinopyroxene	70	Yb	1.14				Phenocryst-Matrix		Schnetzler & Philpotts 1970
Rhyolite	Clinopyroxene	70	Yb			3.5	11.6	Phenocryst-Matrix		Nash & Crecraft 1985
Rhyolite	Garnet	70	Yb	140				Phenocryst-Matrix		Sisson & Bacon 1992
Rhyolite	Garnet	70	Yb			54	67	Phenocryst-Matrix		Irving & Frey 1978
Rhyolite	Ilmenite	70	Yb	4.1				Phenocryst-Matrix		Nash & Crecraft 1985
Rhyolite	K-Feldspar	70	Yb	0.015		0.015		Phenocryst-Matrix		Leeman & Phelps 1981
Rhyolite	K-Feldspar	70	Yb	0.012		0.012		Phenocryst-Matrix		Schnetzler & Philpotts 1970
Rhyolite	K-Feldspar	70	Yb			0.03	0.04	Phenocryst-Matrix		Nash & Crecraft 1985
Rhyolite	Low Calcium Pyroxene	70	Yb	0.91				Phenocryst-Matrix		Bacon & Druitt 1988
Rhyolite	Low Calcium Pyroxene	70	Yb			2	2.4	Phenocryst-Matrix		Nash & Crecraft 1985
Rhyolite	Low Calcium Pyroxene	70	Yb	0.48				Phenocryst-Matrix		Sisson 1991
Rhyolite	Magnetite	70	Yb	0.44				Phenocryst-Matrix		Bacon & Druitt 1988
Rhyolite	Magnetite	70	Yb			1	2.2	Phenocryst-Matrix		Nash & Crecraft 1985
Rhyolite	Plagioclase	70	Yb			0.06	0.13	Phenocryst-Matrix		Nash & Crecraft 1985
Rhyolite	Plagioclase	70	Yb	0.1				Phenocryst-Matrix		Bacon & Druitt 1988
Rhyolite-Dacite	Garnet	70	Yb	26.9				Phenocryst-Matrix		Irving & Frey 1978
Rhyolite-Dacite	K-Feldspar	70	Yb	0.03		0.03		Phenocryst-Matrix		Stix & Gorton 1990
Macusani ash-flow tuffs (peraluminous)	Quartz	70	Yb	0.038				Phenocryst-Matrix		Pichavant et al. (2024)
Macusani ash-flow tuffs (peraluminous)	Plagioclase	70	Yb	0.02				Phenocryst-Matrix		Pichavant et al. (2024)
Macusani ash-flow tuffs (peraluminous)	Biotite	70	Yb	0.03				Phenocryst-Matrix		Pichavant et al. (2024)
Macusani ash-flow tuffs (peraluminous)	Muscovite	70	Yb	0.05				Phenocryst-Matrix		Pichavant et al. (2024)
Topaz rhyolite	Biotite	70	Yb			0.12	1.4	Phenocryst-Matrix		Dailey et al. (2018)
Rhyolite (Fish Canyon Tuff)	Plagioclase	70	Yb	0.01				Phenocryst-Matrix		Bachmann et al. (2005)
Rhyolite (Fish Canyon Tuff)	Sanidine	70	Yb	0.03				Phenocryst-Matrix		Bachmann et al. (2005)
Rhyolite (Fish Canyon Tuff)	Biotite	70	Yb	0.03				Phenocryst-Matrix		Bachmann et al. (2005)
Rhyolite (Fish Canyon Tuff)	Hornblende	70	Yb	9.6				Phenocryst-Matrix		Bachmann et al. (2005)
Rhyolite (Fish Canyon Tuff)	Titanite	70	Yb	393				Phenocryst-Matrix		Bachmann et al. (2005)
Rhyolite (Fish Canyon Tuff)	Zircon	70	Yb	465				Phenocryst-Matrix		Bachmann et al. (2005)
Rhyolite (Peach Spring Tuff)	Titanite	70	Yb	183				Phenocryst-Matrix		Padilla & Gualda (2016)
Rhyolite (Peach Spring Tuff)	Chevkinite	70	Yb	158				Phenocryst-Matrix		Padilla & Gualda (2016)
Rhyolite (Peach Spring Tuff)	Zircon	70	Yb	166				Phenocryst-Matrix		Padilla & Gualda (2016)
Rhyolite (Peach Spring Tuff)	Apatite	70	Yb	77				Phenocryst-Matrix		Padilla & Gualda (2016)
Rhyolite (Peach Spring Tuff)	Amphibole	70	Yb	4.6				Phenocryst-Matrix		Padilla & Gualda (2016)
Granite	Biotite	70	Yb	0.3				Experimental		Were & Kepler (2021)

## Sheet: U
Rock type	Mineral	Z	Element	Value	SD	low	High	Kd Type	Info	Reference
High Silica Rhyolite	Allanite	92	U			14	17	Phenocryst-Matrix		Mahood & Hildreth 1983
High Silica Rhyolite	Allanite	92	U			11.9		Phenocryst-Matrix		Ewart & Griffin 1994
High Silica Rhyolite	Biotite	92	U			0.131	0.19	Phenocryst-Matrix		Mahood & Hildreth 1983
High Silica Rhyolite	Clinopyroxene	92	U			0.12	1.01	Phenocryst-Matrix		Mahood & Hildreth 1983
High Silica Rhyolite	Fayalite, Olivine	92	U			0.12	0.69	Phenocryst-Matrix		Mahood & Hildreth 1983
High Silica Rhyolite	Fayalite, Olivine	92	U	0.7				Phenocryst-Matrix		Michael 1988
High Silica Rhyolite	Ferrohedenbergite, Clinopyroxene	92	U	0.6				Phenocryst-Matrix		Michael 1988
High Silica Rhyolite	Ilmenite	92	U	0.063				Phenocryst-Matrix		Mahood & Hildreth 1983
High Silica Rhyolite	K-Feldspar	92	U			0.008	0.037	Phenocryst-Matrix		Mahood & Hildreth 1983
High Silica Rhyolite	K-Feldspar	92	U			0.002	0.037	Phenocryst-Matrix		Stix & Gorton 1990
High Silica Rhyolite	Low Calcium Pyroxene	92	U			0.07	0.35	Phenocryst-Matrix		Mahood & Hildreth 1983
High Silica Rhyolite	Magnetite	92	U	0.74				Phenocryst-Matrix		Mahood & Hildreth 1983
High Silica Rhyolite	Magnetite	92	U			0.74	0.97	Phenocryst-Matrix		Streck & Grunder 1997
Rhyolite	Biotite	92	U			0.46	1.2	Phenocryst-Matrix		Nash & Crecraft 1985
Rhyolite	Ilmenite	92	U	3.2				Phenocryst-Matrix		Nash & Crecraft 1985
Rhyolite	K-Feldspar	92	U			0.04	0.07	Phenocryst-Matrix		Nash & Crecraft 1985
Rhyolite	Low Calcium Pyroxene	92	U			0.12	0.17	Phenocryst-Matrix		Nash & Crecraft 1985
Rhyolite	Magnetite	92	U			0.21	0.83	Phenocryst-Matrix		Nash & Crecraft 1985
Rhyolite	Plagioclase	92	U			0.05	0.13	Phenocryst-Matrix		Nash & Crecraft 1985
Rhyolite-Dacite	K-Feldspar	92	U	0.04		0.04		Phenocryst-Matrix		Stix & Gorton 1990
Macusani ash-flow tuffs (peraluminous)	Quartz	92	U	0.0001				Phenocryst-Matrix		Pichavant et al. (2024)
Macusani ash-flow tuffs (peraluminous)	Plagioclase	92	U	0.008				Phenocryst-Matrix		Pichavant et al. (2024)
Macusani ash-flow tuffs (peraluminous)	Alkalifeldspar	92	U	0.003				Phenocryst-Matrix		Pichavant et al. (2024)
Macusani ash-flow tuffs (peraluminous)	Biotite	92	U	0.01				Phenocryst-Matrix		Pichavant et al. (2024)
Macusani ash-flow tuffs (peraluminous)	Muscovite	92	U	0.01				Phenocryst-Matrix		Pichavant et al. (2024)
Macusani ash-flow tuffs (peraluminous)	Andalusite	92	U	0.0002				Phenocryst-Matrix		Pichavant et al. (2024)
Macusani ash-flow tuffs (peraluminous)	Ilmenite	92	U	0.04				Phenocryst-Matrix		Pichavant et al. (2024)
Topaz rhyolite	Sanidine	92	U			0.01	0.04	Phenocryst-Matrix		Dailey et al. (2018)
Topaz rhyolite	Plagioclase	92	U			0.03	0.04	Phenocryst-Matrix		Dailey et al. (2018)
Topaz rhyolite	Biotite	92	U			0.02	0.1	Phenocryst-Matrix		Dailey et al. (2018)
Rhyolite (Fish Canyon Tuff)	Plagioclase	92	U					Phenocryst-Matrix		Bachmann et al. (2005)
Rhyolite (Fish Canyon Tuff)	Sanidine	92	U					Phenocryst-Matrix		Bachmann et al. (2005)
Rhyolite (Fish Canyon Tuff)	Biotite	92	U					Phenocryst-Matrix		Bachmann et al. (2005)
Rhyolite (Fish Canyon Tuff)	Hornblende	92	U					Phenocryst-Matrix		Bachmann et al. (2005)
Rhyolite (Fish Canyon Tuff)	Titanite	92	U					Phenocryst-Matrix		Bachmann et al. (2005)
Rhyolite (Fish Canyon Tuff)	Zircon	92	U					Phenocryst-Matrix		Bachmann et al. (2005)
Rhyolite (Fish Canyon Tuff)	Magnetite	92	U					Phenocryst-Matrix		Bachmann et al. (2005)
Rhyolite (Peach Spring Tuff)	Titanite	92	U	3.65				Phenocryst-Matrix		Padilla & Gualda (2016)
Rhyolite (Peach Spring Tuff)	Chevkinite	92	U	6.82				Phenocryst-Matrix		Padilla & Gualda (2016)
Rhyolite (Peach Spring Tuff)	Zircon	92	U	22				Phenocryst-Matrix		Padilla & Gualda (2016)
Rhyolite (Peach Spring Tuff)	Apatite	92	U	2.07				Phenocryst-Matrix		Padilla & Gualda (2016)
Rhyolite (Peach Spring Tuff)	Amphibole	92	U	0.073				Phenocryst-Matrix		Padilla & Gualda (2016)
