# Supplementary material for: Trace element distribution between rhyolitic melts and minerals in highly crystalline assemblages: experimental approach using a quartz trap
Source: Copernicus journal article supplement (doi:10.5194/ejm-38-9-2026), 2026-01-07
Supplement: Supplementary file 2 [file Supplementary Material - Tables S1-S5.pdf › Supplementary Material - Tables S1-S5.pdf]

## Supplementary Material – Tables

**Table S1**

| <b>Target<br/>Temperature</b> | <b>Pressure</b> | <b>Tcycling<br/>up</b> | <b>Tcycling<br/>down</b> | <b>t</b> | <b>Tot. Run<br/>Time</b> |
|-------------------------------|-----------------|------------------------|--------------------------|----------|--------------------------|
| <b>°C</b>                     | <b>Mpa</b>      | <b>°C</b>              | <b>°C</b>                | <b>h</b> | <b>d</b>                 |
| 775                           | 200             | TT +25                 | TT -5                    | 4        | 28                       |
| 725                           | 200             | TT +15                 | TT -15                   | 4        | 30                       |
| 675                           | 200             | TT +15                 | TT -15                   | 4        | 31                       |

Note: cycling was run for all the experiments for a total of 10 days.

1 complete cycle correspond to 4 h (2 hours at high temperature + 2 hours at low temperature).

The transition between the high temperature plateau (~ 2 hours) and the low temperature (~ 2 hours) plateau was achieved within ~5 minutes.

**Table S2:** mineral analyses of solid phases for 775 and 725 °C runs

|                                    | 775 °C |      | 775 °C |      | 775 °C |      | 775 °C |      | 725 °C |      | 725 °C |      |
|------------------------------------|--------|------|--------|------|--------|------|--------|------|--------|------|--------|------|
|                                    | Plag   | std  | Amph   | std  | Bt     | std  | Mag    | std  | Plg    | std  | Mag    | std  |
| <b>n</b>                           | 7      |      | 6      |      | 7      |      | 5      |      | 7      |      | 7      |      |
| <b>SiO<sub>2</sub></b>             | 56.56  | 0.79 | 45.12  | 1.64 | 36.74  | 0.41 | 0.31   | 0.08 | 59.15  | 0.83 | 0.82   | 0.35 |
| <b>TiO<sub>2</sub></b>             | 0.04   | 0.02 | 1.97   | 0.23 | 4.05   | 0.18 | 6.81   | 0.83 | 0.09   | 0.04 | 2.36   | 0.05 |
| <b>Al<sub>2</sub>O<sub>3</sub></b> | 26.38  | 0.43 | 8.53   | 1.03 | 14.06  | 0.10 | 2.09   | 0.10 | 24.30  | 0.52 | 1.30   | 0.06 |
| <b>FeO<sub>tot</sub></b>           | 0.52   | 0.19 | 13.43  | 0.85 | 13.68  | 0.38 | 78.21  | 0.77 | 1.25   | 0.20 | 85.81  | 0.77 |
| <b>MnO</b>                         | 0.02   | 0.01 | 0.42   | 0.10 | 0.15   | 0.06 | 0.64   | 0.06 | 0.03   | 0.04 | 0.91   | 0.06 |
| <b>MgO</b>                         | 0.04   | 0.03 | 13.20  | 0.47 | 13.50  | 0.46 | 1.08   | 0.07 | 0.07   | 0.04 | 1.07   | 0.04 |
| <b>CaO</b>                         | 9.47   | 0.34 | 11.49  | 1.39 | 0.04   | 0.02 | 0.10   | 0.02 | 7.17   | 0.39 | 0.12   | 0.02 |
| <b>Na<sub>2</sub>O</b>             | 5.44   | 0.23 | 1.45   | 0.20 | 0.54   | 0.06 | 0.05   | 0.04 | 6.34   | 0.40 | 0.09   | 0.04 |
| <b>K<sub>2</sub>O</b>              | 0.55   | 0.10 | 0.65   | 0.10 | 8.36   | 0.12 | 0.08   | 0.01 | 0.83   | 0.09 | 0.11   | 0.02 |
| <b>Total</b>                       | 99.02  |      | 96.26  |      | 91.11  |      | 89.34  |      | 99.22  |      | 92.58  |      |

Plg, Amph, Bt and Mag refer to plagioclase, amphibole, biotite and magnetite, respectively. n = numbers of crystals analysed. std refers to 1 $\sigma$  standard deviation.

**Table S3:** Fet-Mg partition coefficient between melt and amphibole-biotite from this study and literature data .

| Reference                | composition                                          | T (°C) | $K_{D, \text{Fe-Mg, amph-bt}}$ |
|--------------------------|------------------------------------------------------|--------|--------------------------------|
| Dall'Agnol et al. (1999) | metaluminous to slightly peraluminous A-type granite | 706    | 0.947                          |
| Costa et al. (2004)      | Dacite (San Pedro)                                   | 850    | 1.039                          |
|                          |                                                      | 825    | 1.113                          |
| Holtz et al. (2005)      | Dacite (Unzen)                                       | 775    | 1.028                          |
| Bogaerts et al. (2006)   | Granodiorite (Lyngdal)                               | 850    | 1.001                          |
| Marxer et al. (2019)     | Tonalite (Adamello)                                  | 750    | 0.887                          |
|                          |                                                      | 725    | 1.212                          |
|                          |                                                      | 700    | 1.256                          |
| Marxer et al. (2022)     | high-Mg basalt (Adamello)                            | 870    | 1.205                          |
|                          |                                                      | 870    | 1.247                          |
| This study               | Dacite (Fish Canyon)                                 | 775    | 1.004                          |

**Table S4:** Glass analyses away from the trap and within the quartz trap at 775 and 725 °C for 9 and 3 hours experimental runs. Data are reported in Figure 5.

| T      | d       | SiO <sub>2</sub> | TiO <sub>2</sub> | Al <sub>2</sub> O <sub>3</sub> | FeO         | MnO         | MgO         | CaO         | Na <sub>2</sub> O | K <sub>2</sub> O | P <sub>2</sub> O <sub>5</sub> | Comment              |
|--------|---------|------------------|------------------|--------------------------------|-------------|-------------|-------------|-------------|-------------------|------------------|-------------------------------|----------------------|
| 775 °C | 3 h     | 74.51            | 0.26             | 14.45                          | 0.99        | 0.12        | 0.21        | 1.80        | 3.07              | 4.60             | n.a.                          | glass-away from trap |
|        |         | 74.23            | 0.22             | 14.45                          | 1.29        | 0.11        | 0.18        | 1.68        | 3.27              | 4.57             | n.a.                          | glass-away from trap |
|        |         | 74.67            | 0.21             | 14.23                          | 1.11        | 0.10        | 0.14        | 1.64        | 3.26              | 4.64             | n.a.                          | glass-away from trap |
|        |         | 74.55            | 0.24             | 14.14                          | 1.25        | 0.06        | 0.26        | 1.79        | 3.19              | 4.54             | n.a.                          | glass-away from trap |
|        |         | 74.04            | 0.21             | 14.49                          | 1.22        | 0.02        | 0.22        | 1.74        | 3.45              | 4.61             | n.a.                          | glass-away from trap |
|        | average | <b>74.40</b>     | <b>0.23</b>      | <b>14.35</b>                   | <b>1.17</b> | <b>0.08</b> | <b>0.20</b> | <b>1.73</b> | <b>3.25</b>       | <b>4.59</b>      |                               |                      |
| 775 °C | 3 h     | 77.64            | 0.18             | 12.88                          | 1.04        | 0.03        | 0.16        | 1.45        | 2.27              | 4.34             | n.a.                          | glass-in trap        |
|        |         | 75.67            | 0.20             | 13.62                          | 1.06        | 0.09        | 0.16        | 1.58        | 3.20              | 4.42             | n.a.                          | glass-in trap        |
|        |         | 76.82            | 0.23             | 12.91                          | 1.15        | 0.10        | 0.17        | 1.45        | 2.92              | 4.26             | n.a.                          | glass-in trap        |
|        | average | <b>76.71</b>     | <b>0.20</b>      | <b>13.14</b>                   | <b>1.08</b> | <b>0.07</b> | <b>0.17</b> | <b>1.49</b> | <b>2.80</b>       | <b>4.34</b>      |                               |                      |
| 775 °C | 9 h     | 74.07            | 0.18             | 14.66                          | 1.08        | 0.03        | 0.22        | 1.46        | 3.49              | 4.81             | n.a.                          | glass-away from trap |
|        |         | 75.15            | 0.22             | 14.04                          | 0.91        | 0.03        | 0.17        | 1.40        | 3.24              | 4.84             | n.a.                          | glass-away from trap |
|        |         | 74.09            | 0.23             | 14.25                          | 1.31        | 0.07        | 0.17        | 1.45        | 3.56              | 4.87             | n.a.                          | glass-away from trap |
|        |         | 74.46            | 0.25             | 14.21                          | 1.20        | 0.06        | 0.17        | 1.58        | 3.37              | 4.70             | n.a.                          | glass-away from trap |
|        |         | 74.68            | 0.22             | 14.23                          | 1.15        | 0.07        | 0.18        | 1.38        | 3.38              | 4.73             | n.a.                          | glass-away from trap |
|        | average | <b>74.49</b>     | <b>0.22</b>      | <b>14.28</b>                   | <b>1.13</b> | <b>0.05</b> | <b>0.18</b> | <b>1.45</b> | <b>3.41</b>       | <b>4.79</b>      |                               |                      |
| 775 °C | 9 h     | 77.49            | 0.21             | 12.54                          | 0.77        | 0.01        | 0.15        | 0.98        | 3.07              | 4.78             | n.a.                          | glass-in trap        |

|                |     |              |             |              |             |             |             |             |             |             |             |                      |
|----------------|-----|--------------|-------------|--------------|-------------|-------------|-------------|-------------|-------------|-------------|-------------|----------------------|
|                |     | 77.38        | 0.19        | 12.60        | 0.89        | 0.06        | 0.16        | 1.02        | 3.09        | 4.61        | n.a.        | glass-in trap        |
|                |     | 77.43        | 0.22        | 12.40        | 1.01        | 0.04        | 0.11        | 1.17        | 3.05        | 4.57        | n.a.        | glass-in trap        |
|                |     | 77.12        | 0.17        | 12.49        | 1.21        | 0.02        | 0.13        | 1.01        | 3.10        | 4.74        | n.a.        | glass-in trap        |
| <b>average</b> |     | <b>77.35</b> | <b>0.20</b> | <b>12.51</b> | <b>0.97</b> | <b>0.03</b> | <b>0.14</b> | <b>1.05</b> | <b>3.08</b> | <b>4.67</b> | <b>n.a.</b> |                      |
| <hr/>          |     |              |             |              |             |             |             |             |             |             |             |                      |
| 725 °C         | 3 h | 77.24        | 0.13        | 13.09        | 0.54        | 0.08        | 0.08        | 0.97        | 2.76        | 5.10        | 0.02        | glass-away from trap |
|                |     | 77.22        | 0.15        | 13.32        | 0.58        | 0.10        | 0.21        | 1.01        | 2.51        | 4.88        | 0.02        | glass-away from trap |
|                |     | 76.50        | 0.15        | 13.28        | 0.83        | 0.00        | 0.06        | 1.10        | 2.97        | 5.09        | 0.02        | glass-away from trap |
|                |     | 76.81        | 0.11        | 13.12        | 0.59        | 0.08        | 0.05        | 1.36        | 2.79        | 5.08        | 0.02        | glass-away from trap |
| <b>average</b> |     | <b>76.95</b> | <b>0.13</b> | <b>13.20</b> | <b>0.63</b> | <b>0.09</b> | <b>0.10</b> | <b>1.11</b> | <b>2.76</b> | <b>5.04</b> | <b>0.02</b> |                      |
| <hr/>          |     |              |             |              |             |             |             |             |             |             |             |                      |
| 725 °C         | 3 h | 79.50        | 0.15        | 11.96        | 0.69        | 0.00        | 0.10        | 0.91        | 2.17        | 4.51        | 0.02        | glass-in trap        |
|                |     | 79.21        | 0.12        | 12.02        | 0.49        | 0.00        | 0.06        | 0.88        | 2.48        | 4.74        | 0.01        | glass-in trap        |
|                |     | 78.96        | 0.14        | 12.37        | 0.28        | 0.00        | 0.00        | 1.06        | 2.49        | 4.67        | 0.02        | glass-in trap        |
|                |     | 79.05        | 0.11        | 12.04        | 0.46        | 0.00        | 0.13        | 1.09        | 2.40        | 4.72        | 0.01        | glass-in trap        |
|                |     | 79.41        | 0.15        | 11.86        | 0.57        | 0.00        | 0.13        | 1.06        | 2.20        | 4.61        | 0.02        | glass-in trap        |
| <b>average</b> |     | <b>79.23</b> | <b>0.13</b> | <b>12.05</b> | <b>0.50</b> | <b>0.00</b> | <b>0.11</b> | <b>1.00</b> | <b>2.35</b> | <b>4.65</b> | <b>0.02</b> |                      |
| <hr/>          |     |              |             |              |             |             |             |             |             |             |             |                      |
| 725 °C         | 9 h | 77.11        | 0.15        | 13.17        | 0.78        | 0.09        | 0.17        | 1.06        | 2.46        | 5.00        | 0.02        | glass-away from trap |
|                |     | 76.75        | 0.13        | 13.22        | 0.73        | 0.15        | 0.13        | 1.02        | 2.81        | 5.05        | 0.01        | glass-away from trap |
|                |     | 76.48        | 0.24        | 12.98        | 0.99        | 0.03        | 0.43        | 1.21        | 2.56        | 5.07        | 0.01        | glass-away from trap |
|                |     | 77.60        | 0.13        | 12.82        | 0.57        | 0.04        | 0.17        | 1.09        | 2.61        | 4.92        | 0.03        | glass-away from trap |
| <b>average</b> |     | <b>76.99</b> | <b>0.16</b> | <b>13.05</b> | <b>0.77</b> | <b>0.08</b> | <b>0.22</b> | <b>1.09</b> | <b>2.61</b> | <b>5.01</b> | <b>0.02</b> |                      |
| <hr/>          |     |              |             |              |             |             |             |             |             |             |             |                      |
| 725 °C         | 9 h | 78.94        | 0.14        | 12.12        | 0.79        | 0.07        | 0.11        | 0.88        | 2.39        | 4.54        | 0.02        | glass-in trap        |

|                |              |             |              |             |             |             |             |             |             |             |               |
|----------------|--------------|-------------|--------------|-------------|-------------|-------------|-------------|-------------|-------------|-------------|---------------|
|                | 78.78        | 0.14        | 12.32        | 0.67        | 0.00        | 0.10        | 1.09        | 2.30        | 4.58        | 0.02        | glass-in trap |
|                | 79.57        | 0.12        | 11.77        | 0.43        | 0.00        | 0.12        | 1.05        | 2.43        | 4.51        | 0.01        | glass-in trap |
|                | 79.36        | 0.20        | 12.07        | 0.31        | 0.03        | 0.14        | 1.01        | 2.44        | 4.42        | 0.01        | glass-in trap |
| <b>average</b> | <b>79.16</b> | <b>0.15</b> | <b>12.07</b> | <b>0.55</b> | <b>0.03</b> | <b>0.12</b> | <b>1.01</b> | <b>2.39</b> | <b>4.51</b> | <b>0.02</b> |               |

---

**Table S5:** Partition coefficients

| Element | K <sub>D</sub>   |                  |                  |                   |
|---------|------------------|------------------|------------------|-------------------|
|         | Plag             | Bt               | Ilm              | Amph              |
| Zr      | 0.003            | 0.14             | 1.39             | 0.5 <sup>1</sup>  |
| Nb      | 0.003            | 9.75             | 91.2             | 2.5 <sup>2</sup>  |
| Cs      | 0.0007           | 0.46             | 0.0005           | 0.01 <sup>1</sup> |
| Yb      | 0.02             | 0.03             | 1.5 <sup>4</sup> | 3 <sup>3</sup>    |
| U       | 0.008            | 0.01             | 0.04             | 0.01 <sup>6</sup> |
| Ce      | 3.57             | 0.005            | 0.01             | 3 <sup>5</sup>    |
| Y       | 0.1 <sup>4</sup> | 1.2 <sup>4</sup> | 0.4 <sup>2</sup> | 10 <sup>5</sup>   |

All values from Pichavant et al. (2024), if not indicated otherwise.

<sup>1</sup>Bacon and Druitt (1988)

<sup>2</sup>Ewart & Griffin (1994)

<sup>3</sup>Nagasawa and Schnetzler (1971)

<sup>4</sup>Nash and Crecraft (1985)

<sup>5</sup>Sisson (1994)

<sup>6</sup>KD of U for Amph was taken from Bt
