# Supplementary material for: Trace element distribution between rhyolitic melts and minerals in highly crystalline assemblages: experimental approach using a quartz trap
Source: Copernicus journal article supplement (doi:10.5194/ejm-38-9-2026), 2026-01-07
Supplement: Supplementary file [file ejm-38-9-2026-supplement-title-page.pdf › ejm-38-9-2026-supplement-title-page.pdf]

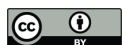

*Supplement of*

**Trace element distribution between rhyolitic melts and minerals in highly crystalline assemblages: experimental approach using a quartz trap**

**Francesco Vetere et al.**

*Correspondence to:* Francesco Vetere ([francesco.vetere@unisi.it](mailto:francesco.vetere@unisi.it))

- [ejm-38-9-2026-supplement-title-page.pdf](#)
- [Supplementary Material - Figures.pdf](#)
- [Supplementary Material - Tables S1-S5.pdf](#)
- [Supplementary Material Tables S6.xlsx](#)

The copyright of individual parts of the supplement might differ from the article licence.
